# Supplementary material for: Controllable synthesis and electrochemical hydrogen storage properties of Sb2Se3 ultralong nanobelts with urchin-like structures
Source: Royal Society of Chemistry journal article supplement (doi:10.1039/c1nr10584a), 2011-01-01
Supplement: c1nr10584a.pdf [file c1nr10584a.pdf]

## Controllable Synthesis and Electrochemical Hydrogen Storage Properties of $\text{Sb}_2\text{Se}_3$

### Ultralong Nanobelts with Urchin-like Structures

Rencheng Jin, Gang Chen,\* Jian Pei, Jingxue Sun, and Yang Wang

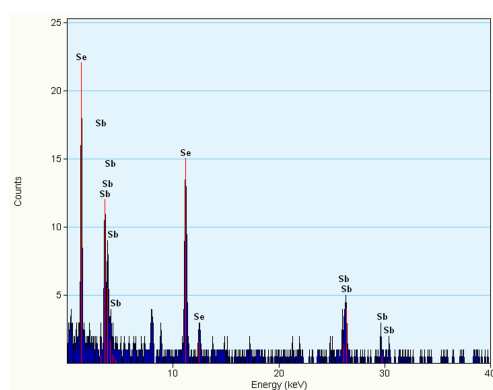

Fig. S1 EDAX spectrum of the obtained  $\text{Sb}_2\text{Se}_3$  ultralong nanobelt.

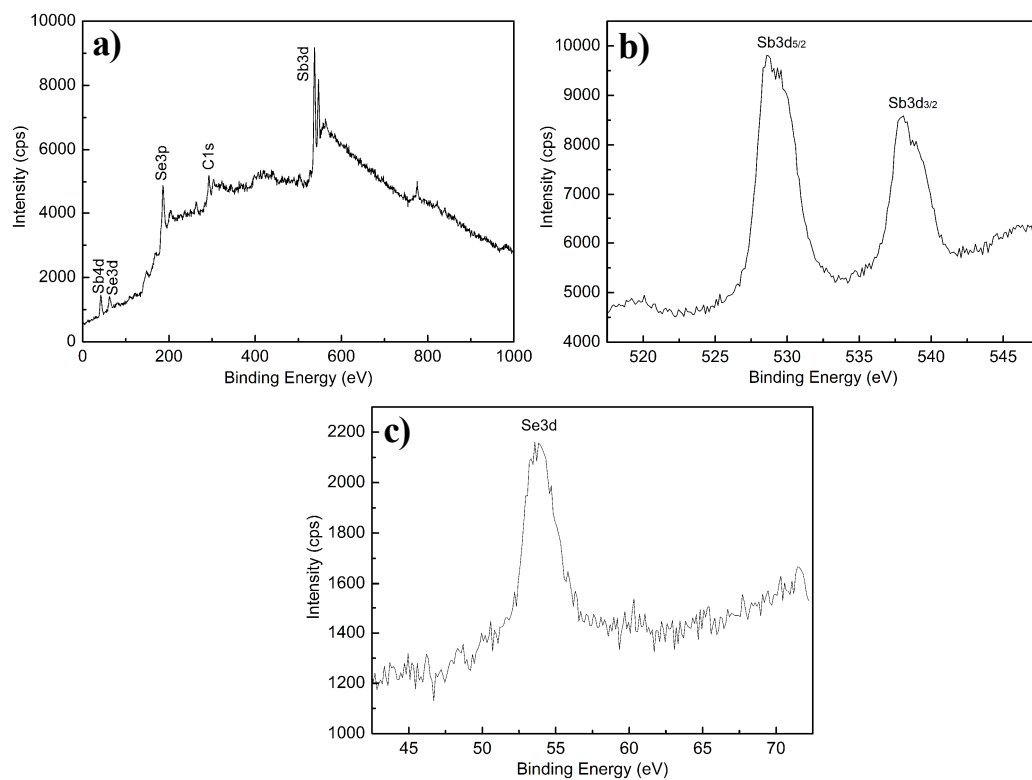

Fig. S2 XPS data from the surface of the obtained  $\text{Sb}_2\text{Se}_3$  ultralong nanobelt: a) the whole-range spectrum; b)  $\text{Sb} 3d$  core-level spectrum; c)  $\text{Se} 3d$  core-level spectrum.

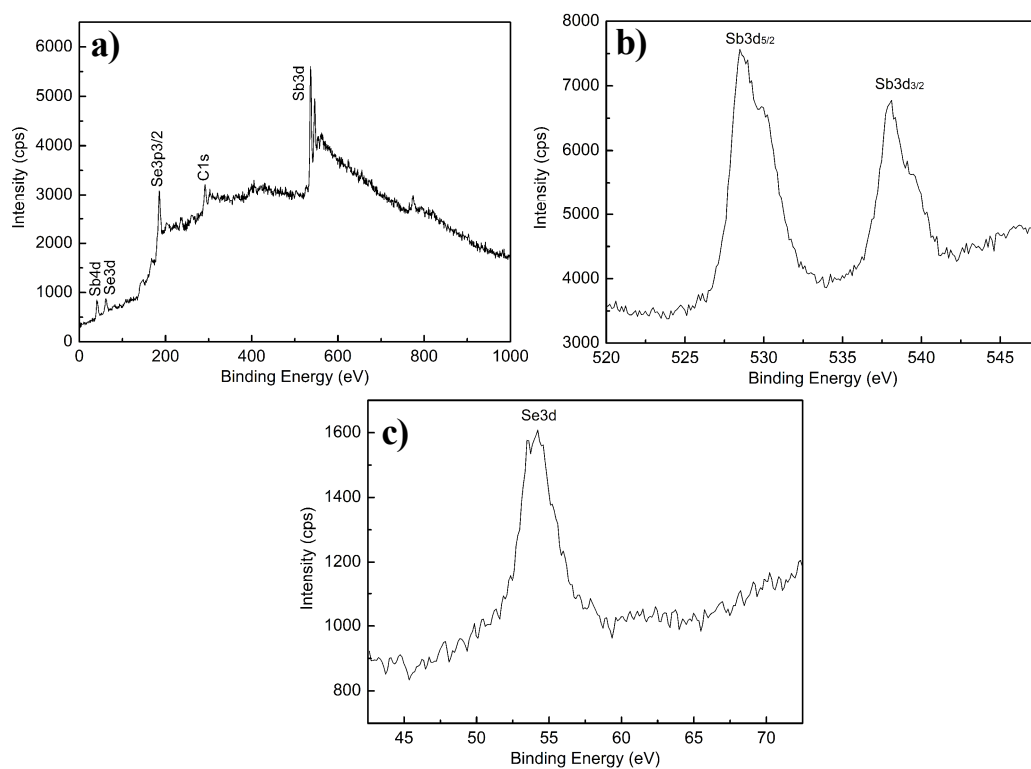

Fig. S3 XPS data from the surface of the obtained urchin like  $\text{Sb}_2\text{Se}_3$ : a) the whole-range spectrum; b) Sb 3d core-level spectrum; c) Se 3d core-level spectrum.

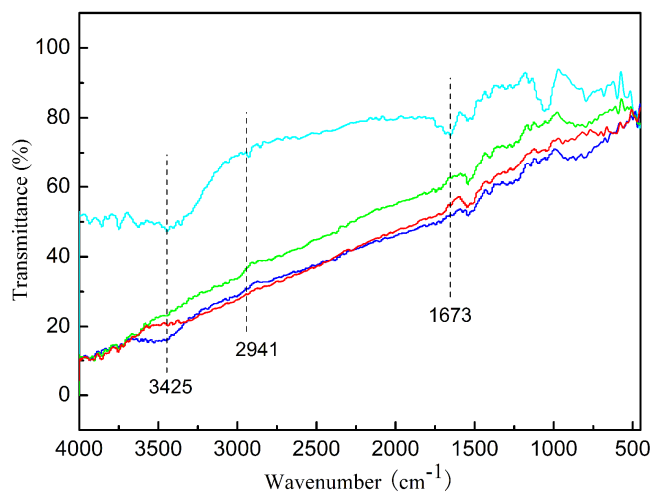

Fig. S4 FT-IR spectra of the samples prepared with different amount of citric acid: a) 0 g (green), b) 0.2 g (red), c) 0.4 g (blue), d) 0.6 g (cyan).

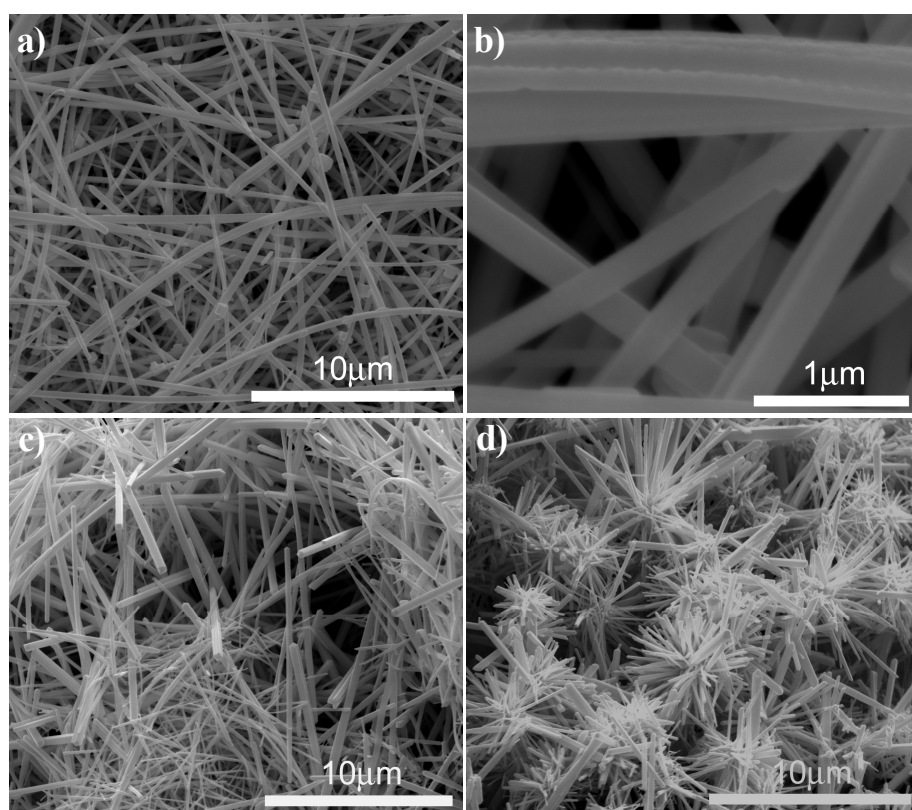

Fig. S5 FESEM images of the samples prepared by a solvothermal reaction in a mixed solvent at 180 °C for 18 h for different concentrations of glucose. a,b) 0.3 g; c) 0.9 g; d) 1.5 g.

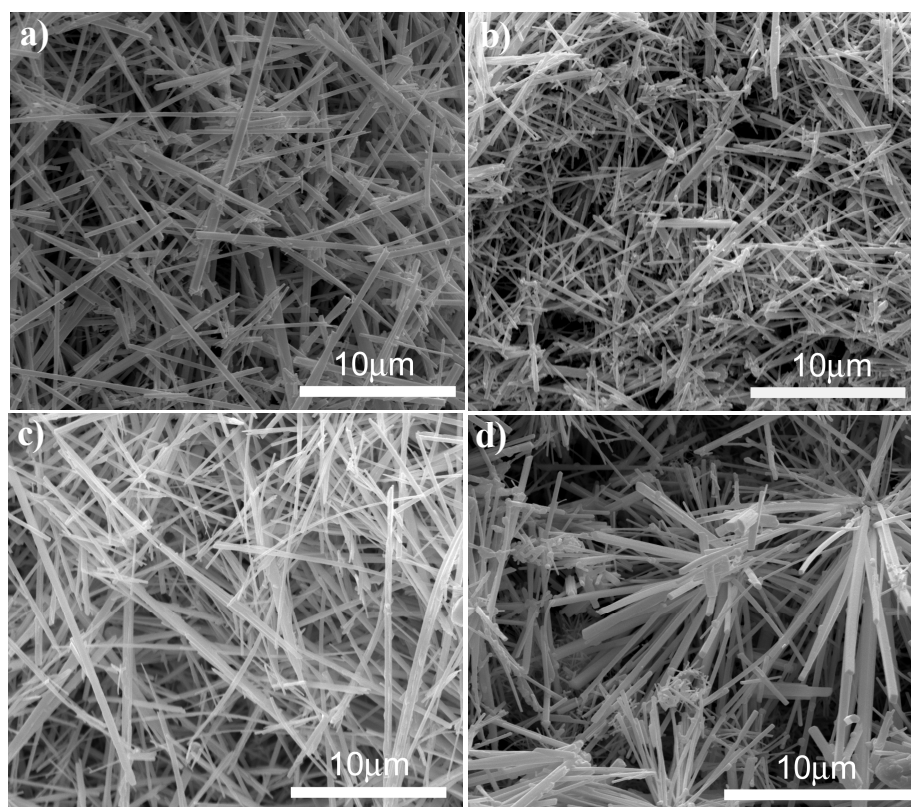

Fig. S6 FESEM images of the samples prepared by a solvothermal reaction with the addition of different volumes of ethylene glycol. a) 0 mL; b) 10 mL; c) 15 mL; d) 30 mL.
